# Supplementary material for: Beyond the exome: utility of long-read whole genome sequencing in exome-negative autosomal recessive diseases
Source: PubMed Central journal article supplement (PMC10720148; doi:10.1186/s13073-023-01270-8), 2023-12-14
Supplement: 13073_2023_1270_MOESM1_ESM.pdf [file 13073_2023_1270_MOESM1_ESM.pdf]

# Fig. S1

**A**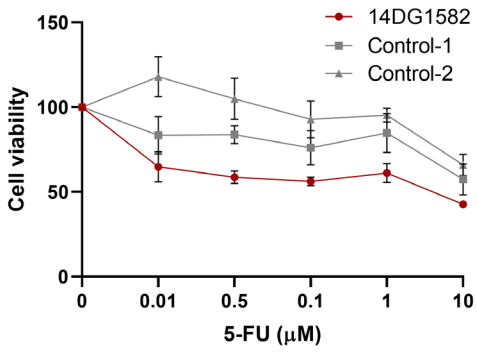**B**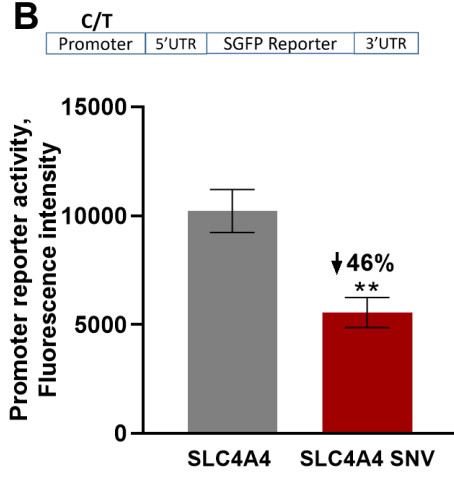**C**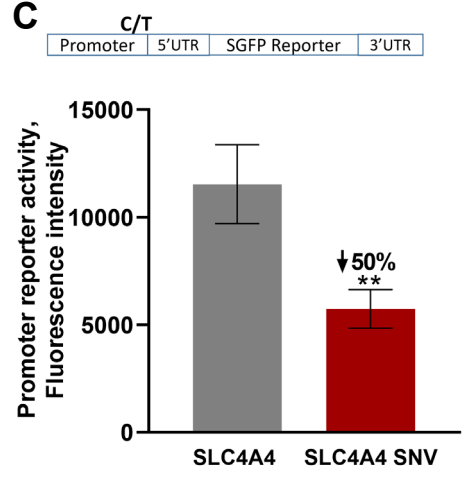**D**

14DG2098

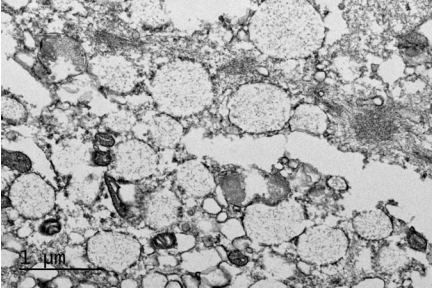

Control

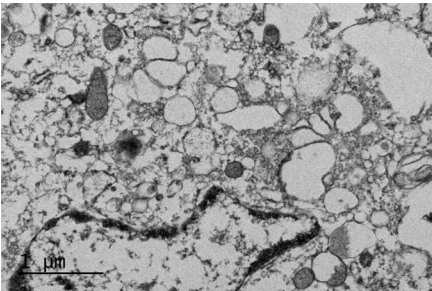**E**

14DG2102

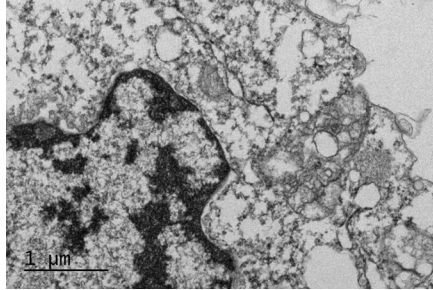

17DG0429

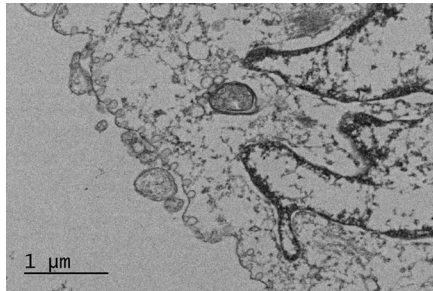

14DG2107

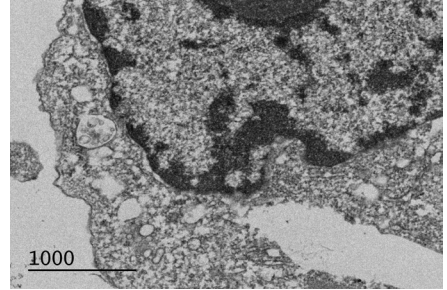

Control

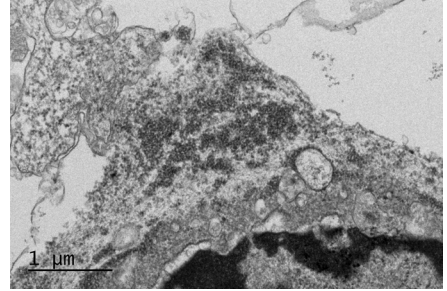

**Fig. S2**

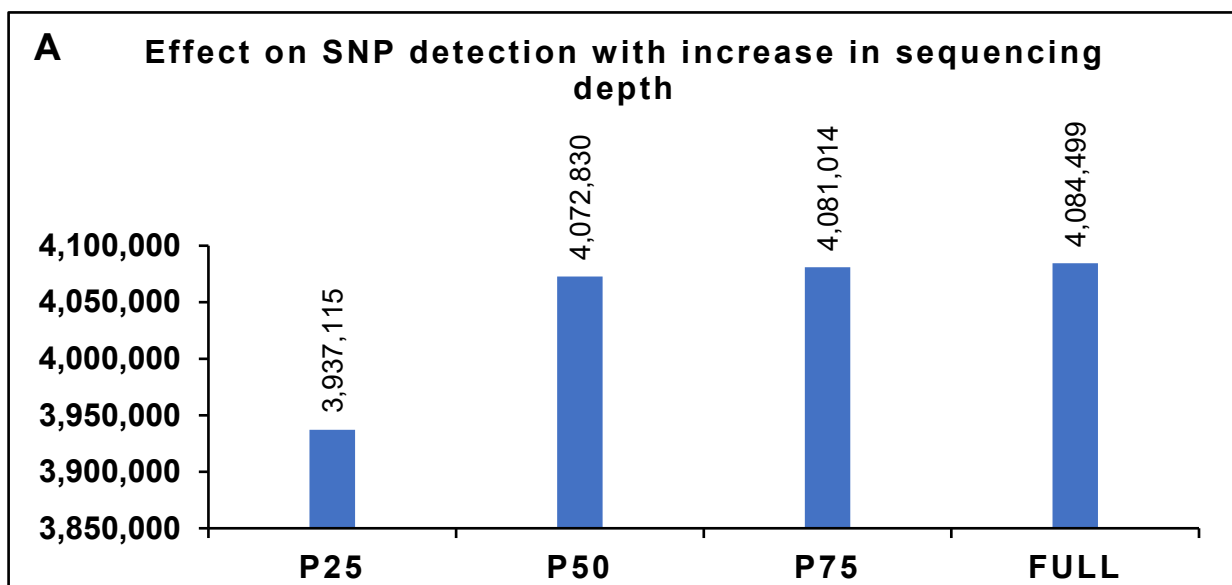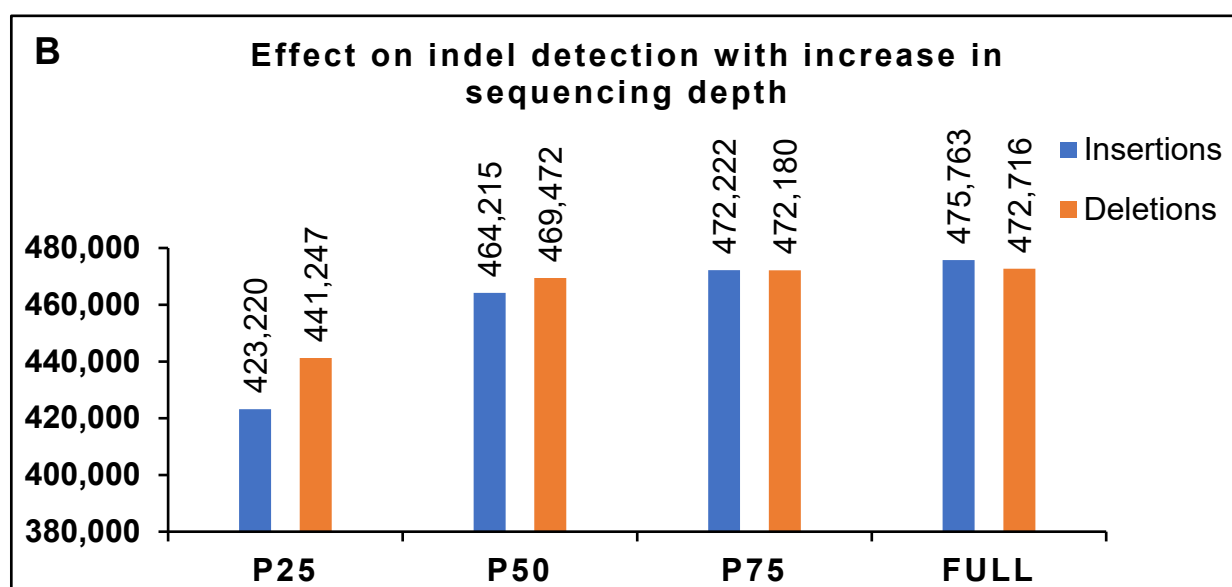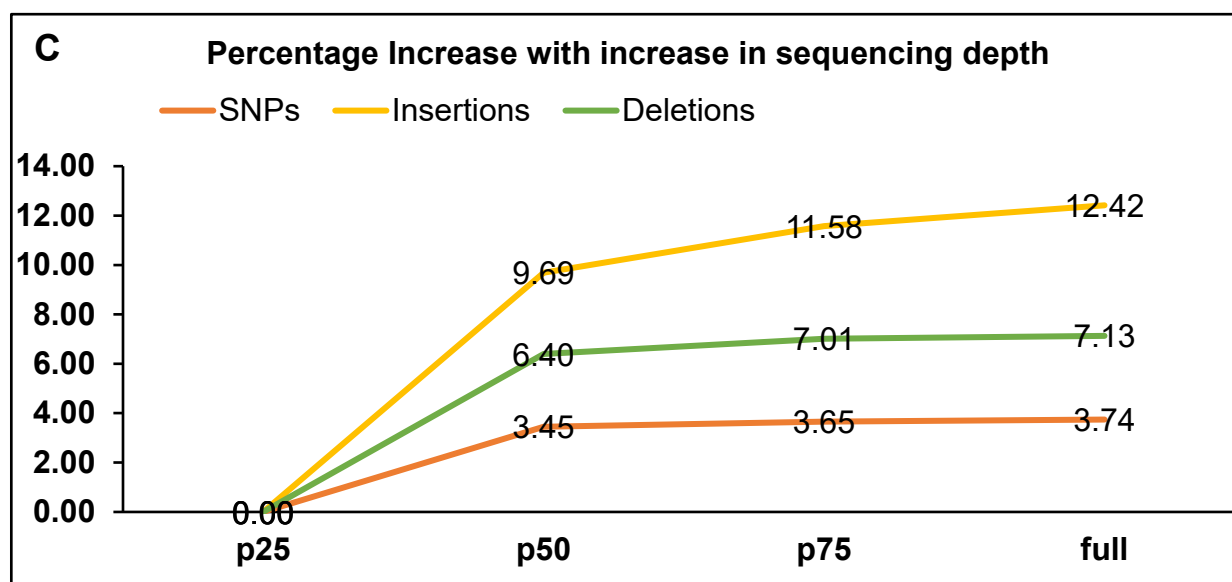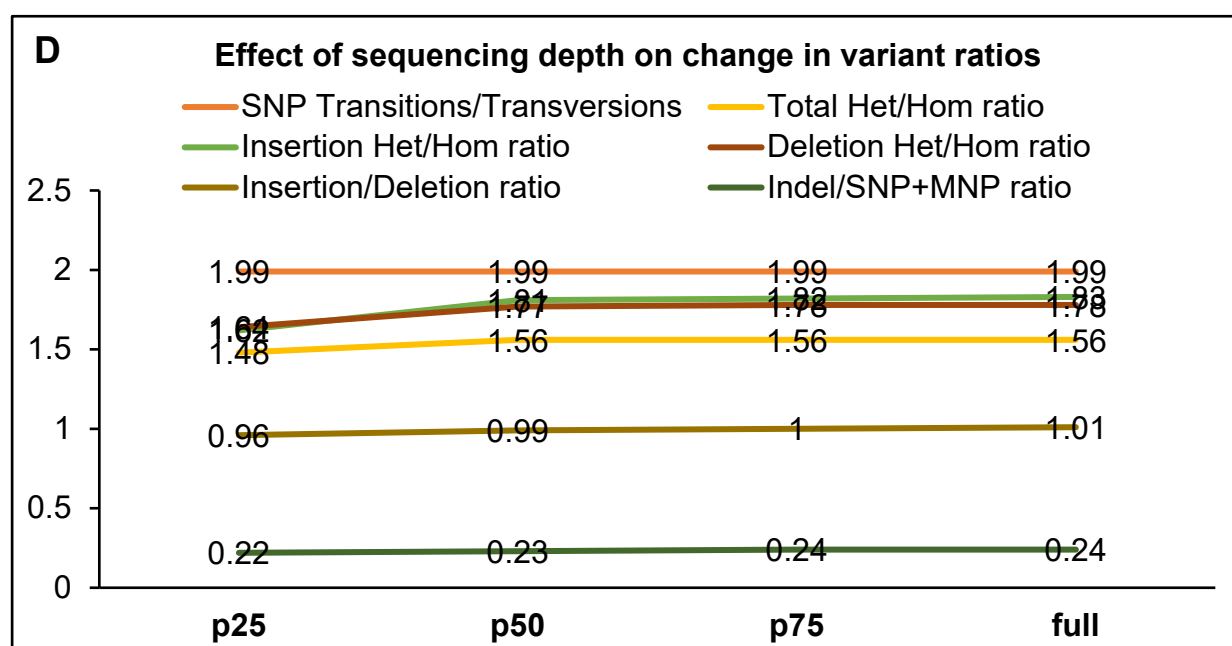

# Fig. S3

A

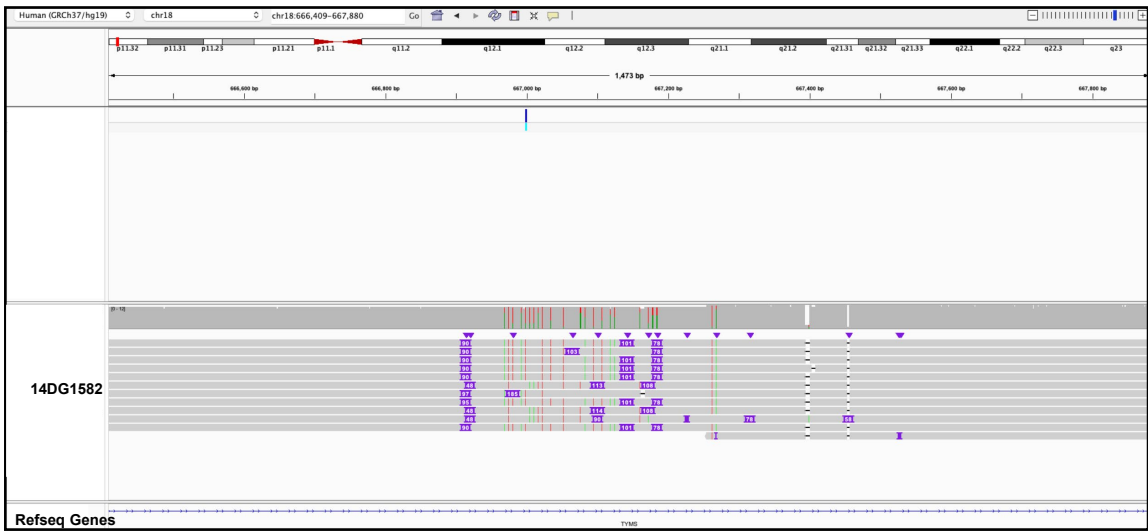

*TYMS*  
 NM\_001071.4:c.455-2073ins of 270bp

B

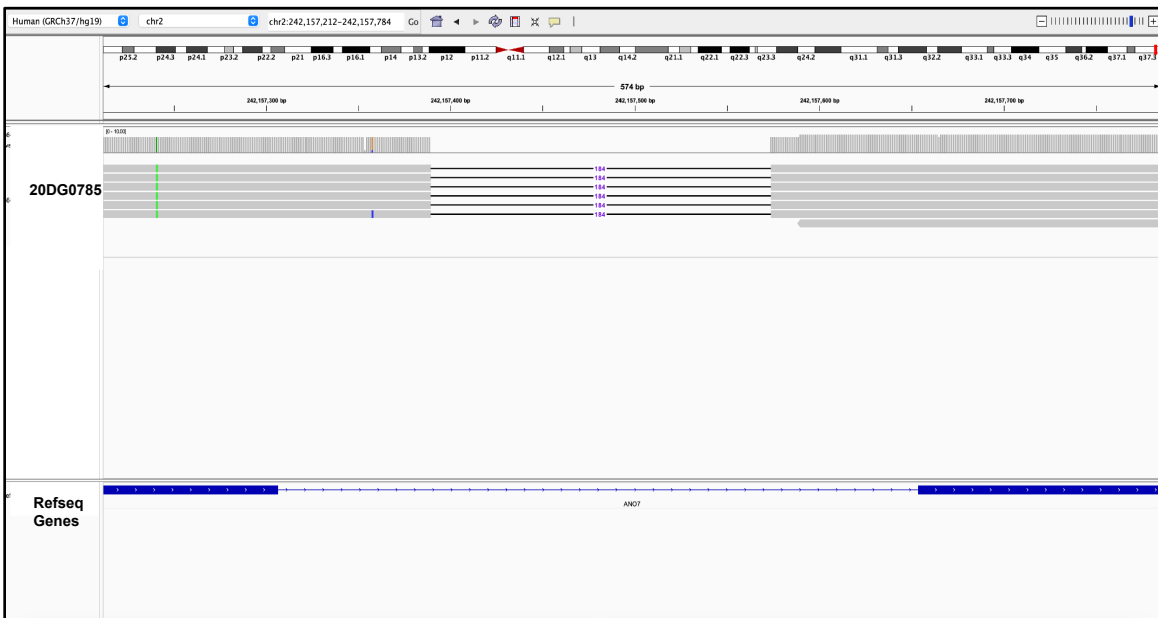

*ANO7*  
 NM\_001370694.2:c.2178+83del of 184bp

C

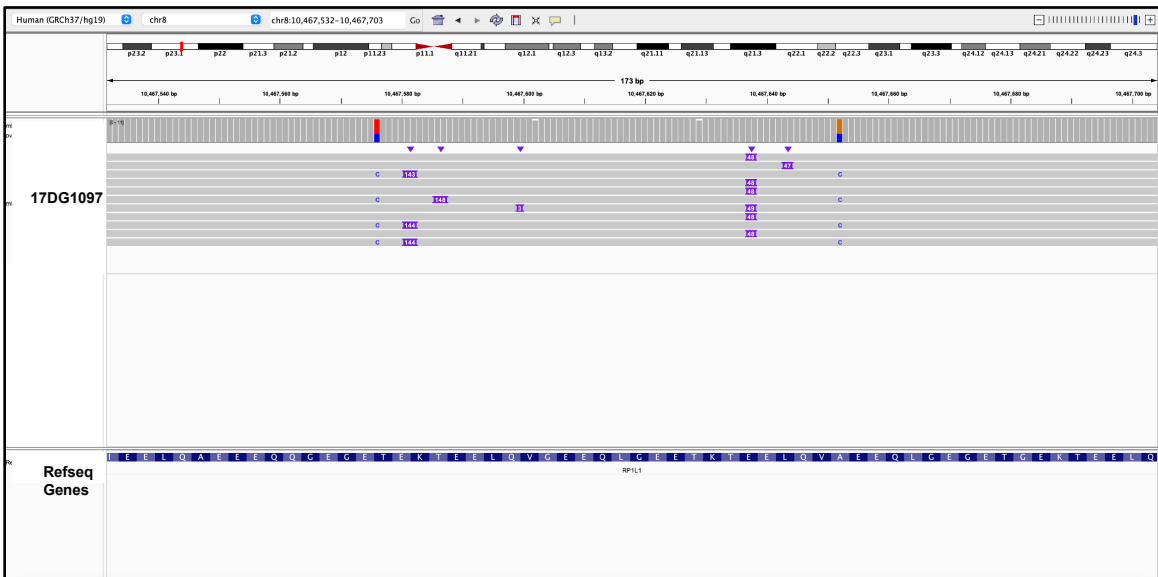

*RP1L1*

NM\_178857.6:c.4026\_4027InsACAGAAGAAGGGCTGCAAGAAGAGGGGGTGCAGTTAGAGGAACTAAA  
 ACAGAAGAAGGGCTGCAAGAAGAGGGGGTGCAGTTAGAGGAACTAAAACAGAAGAAGGGCTGCAAG  
 AAGAGGGGGTGCAGTTAGAGGGGACTAAA

and

NM\_178857.6:c.3970\_3971insGGACTAAAGTAATAGAAGGGCTGCAAGAAGAGAGGGTGCAGTTAGAGG

D

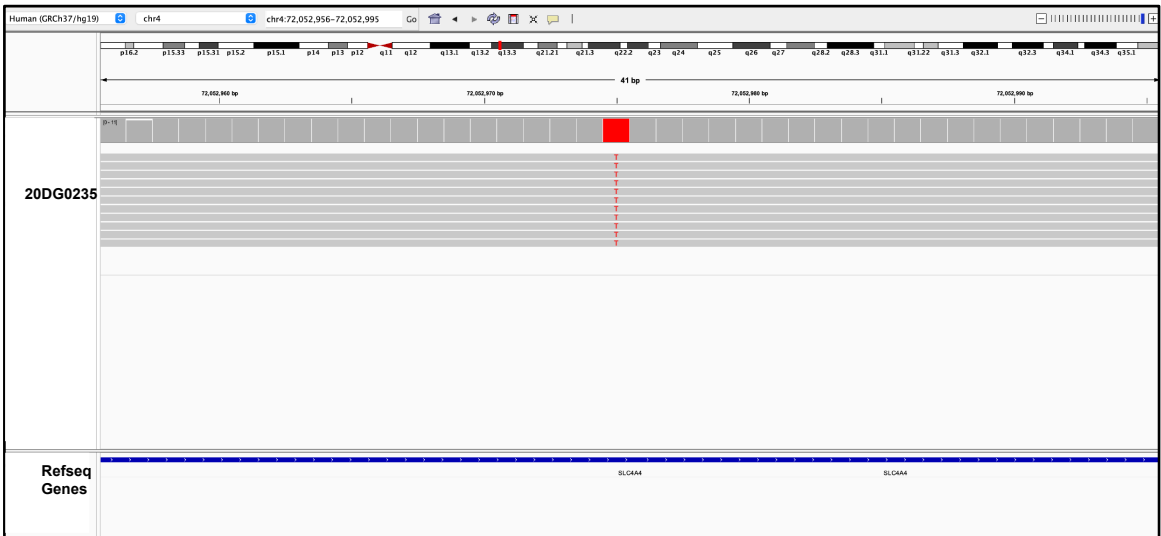

*SLC4A4*  
NM\_001134742.2:c.-145C>T

E

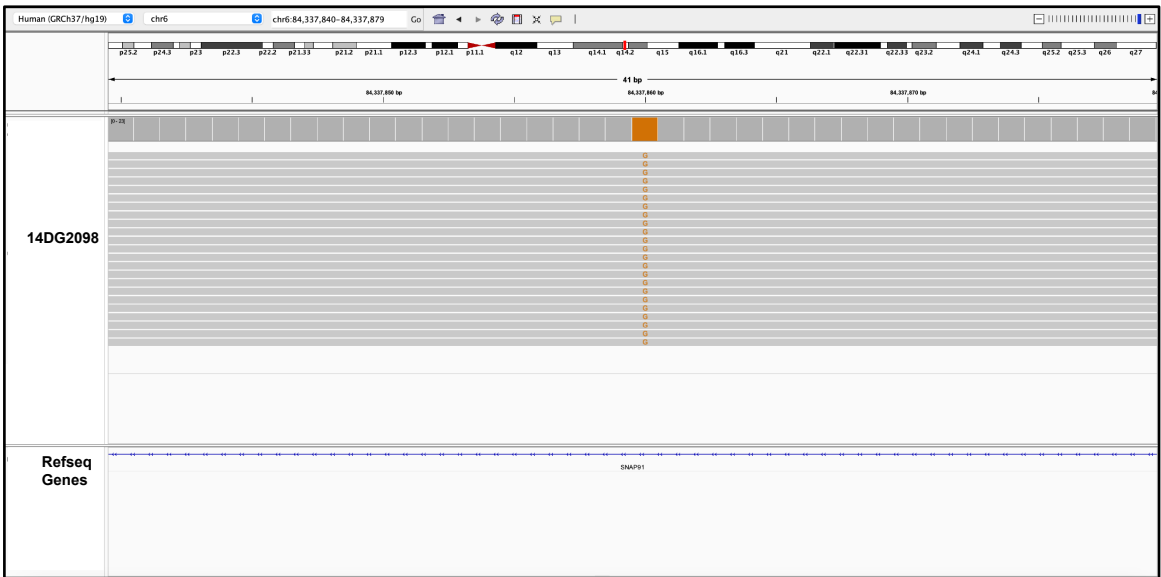

*SNAP91*  
NM\_001242792.1:c.766-4799T>C

F

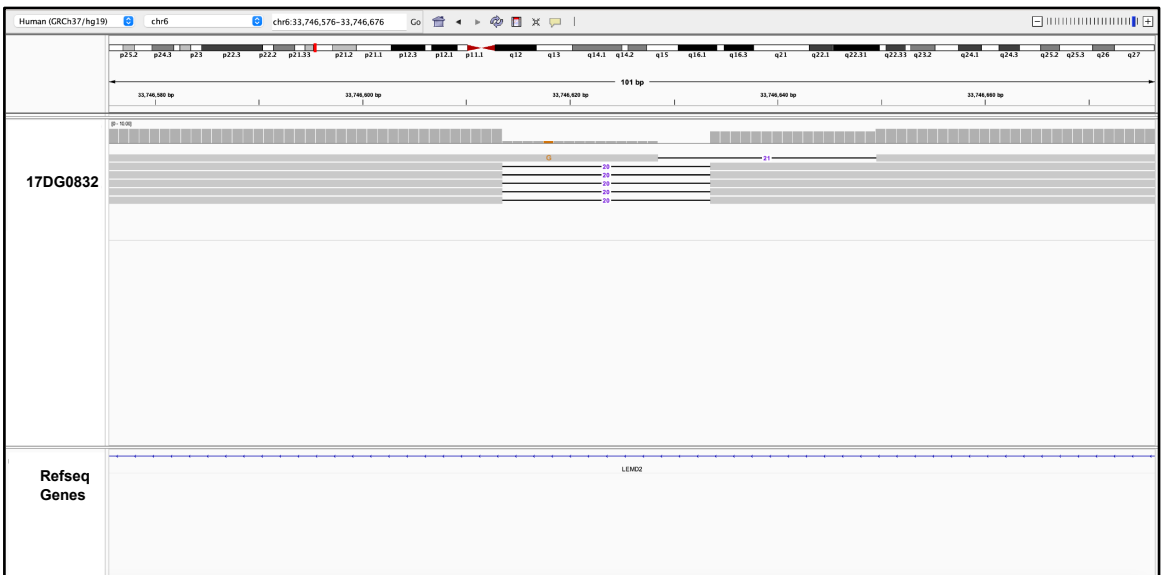

*LEMD2*  
NM\_181336.4:c.1011-469\_1011-450del

**G**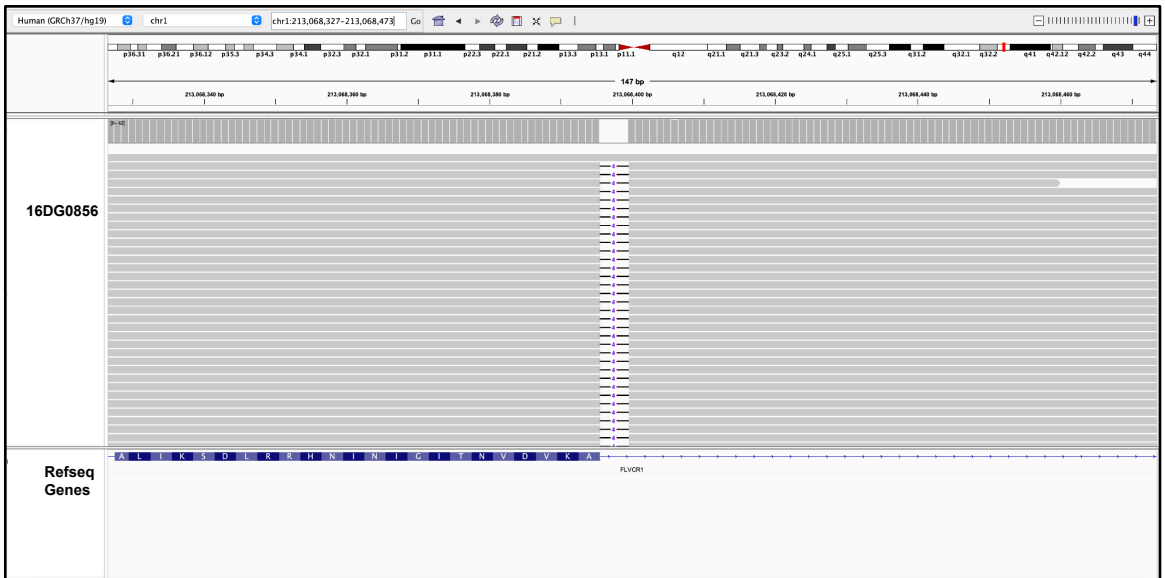

*FLVCR1*  
 NM\_014053.4:c.1593+5\_1593+8del

**H**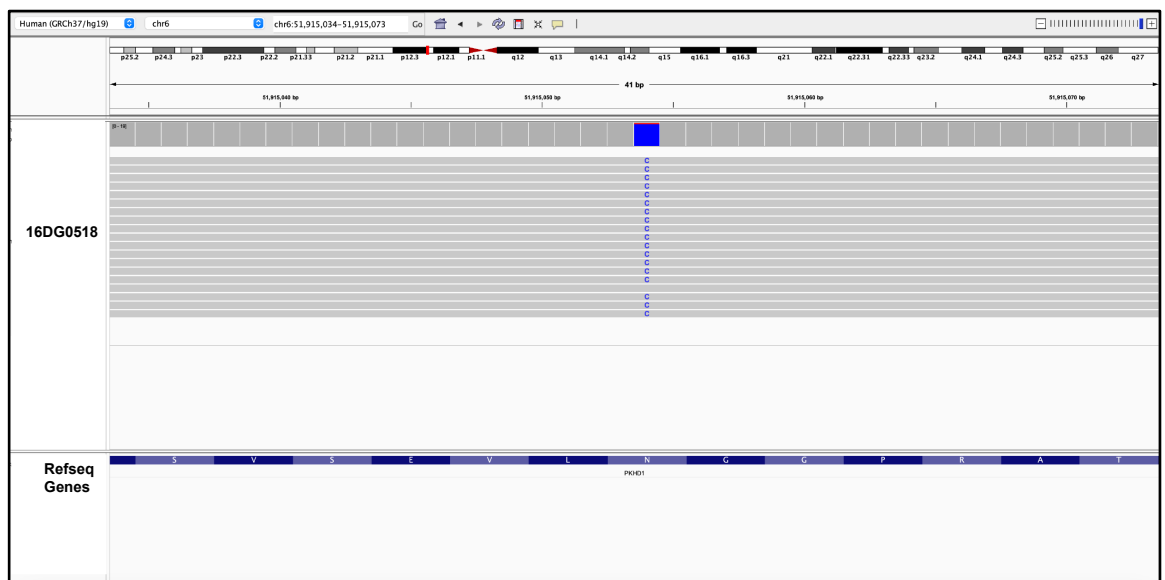

*PKHD1*  
 NM\_138694.4:c.2180A>G;p.(Asn727Ser)

**I**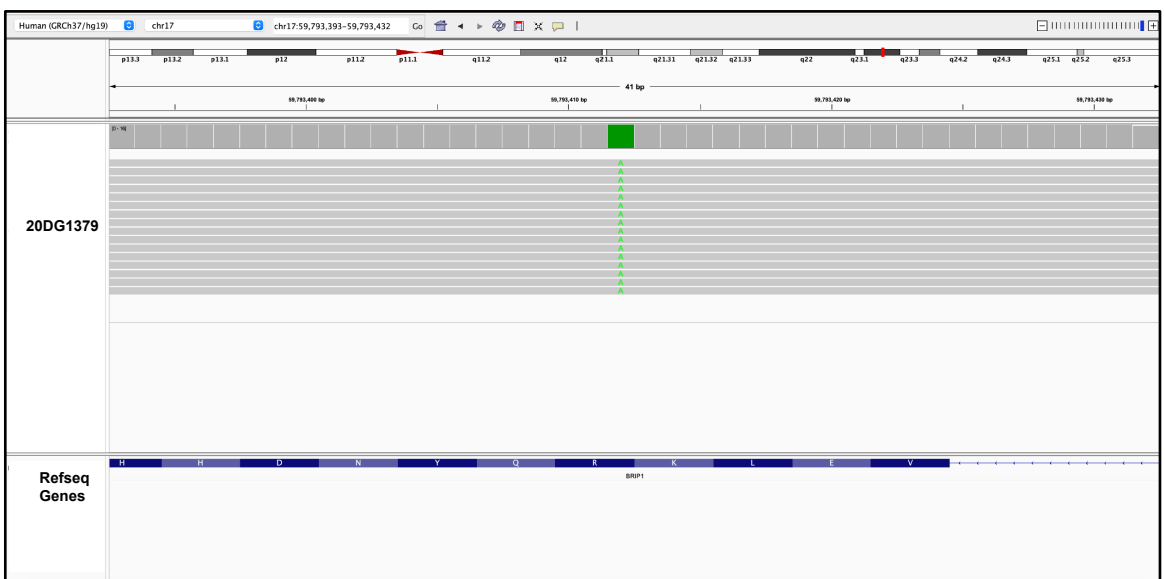

*BRIP1*  
 NM\_032043.3:c.2392C>T;p.(Arg798\*)

**J**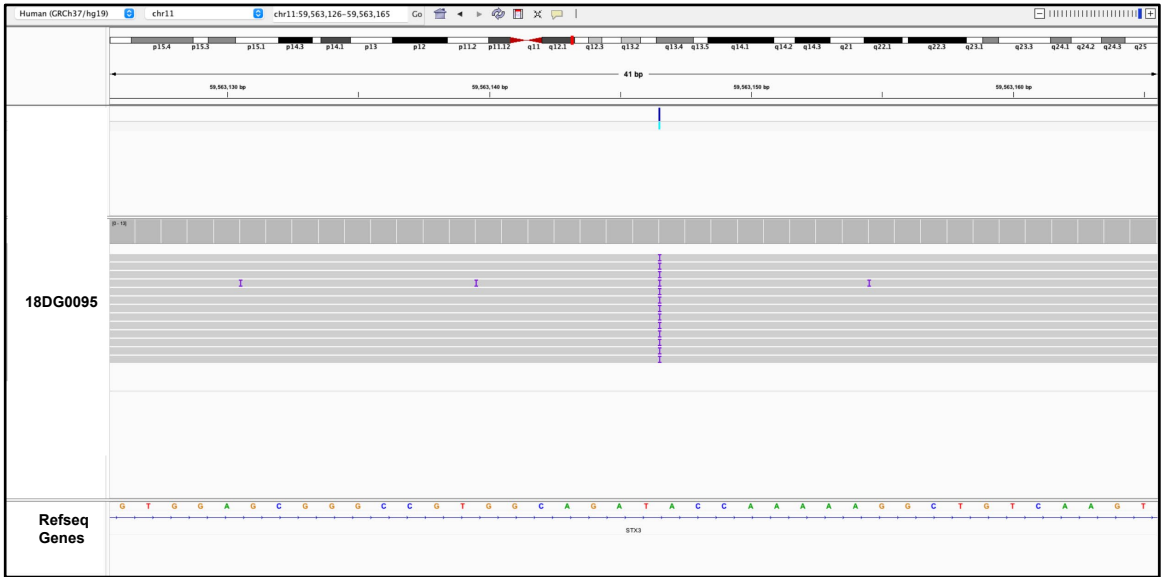

*STX3*  
ENST00000437946.2:c.455dup;p.(Asp152Glufs\*11)

**K**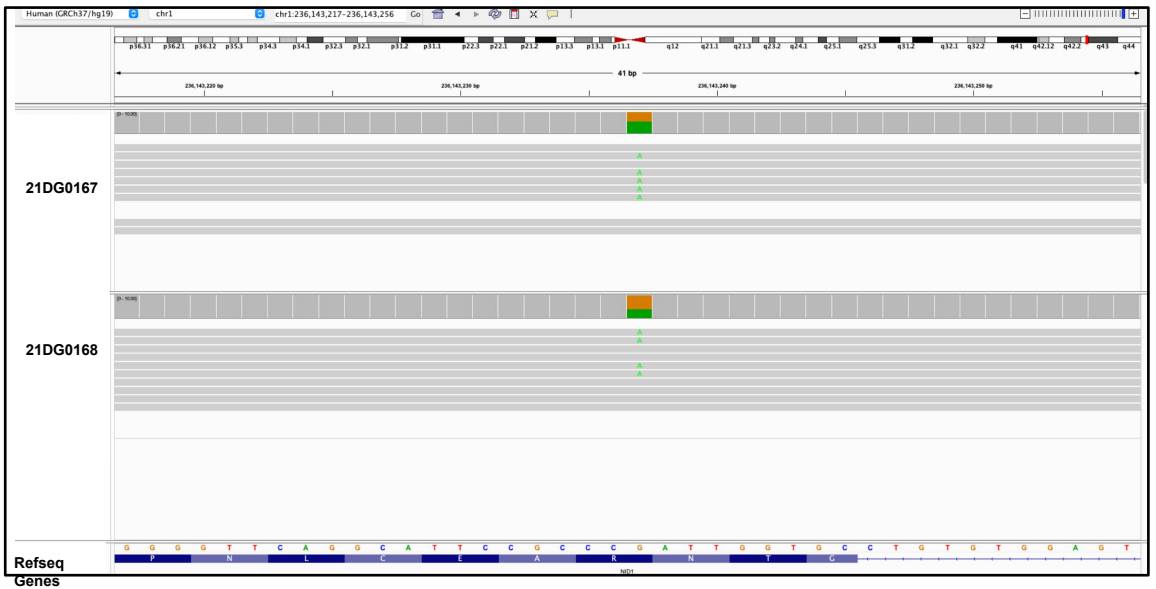

*NID1*  
NM\_002508.3:c.3394C>T;p.(Arg1132Trp)

**L**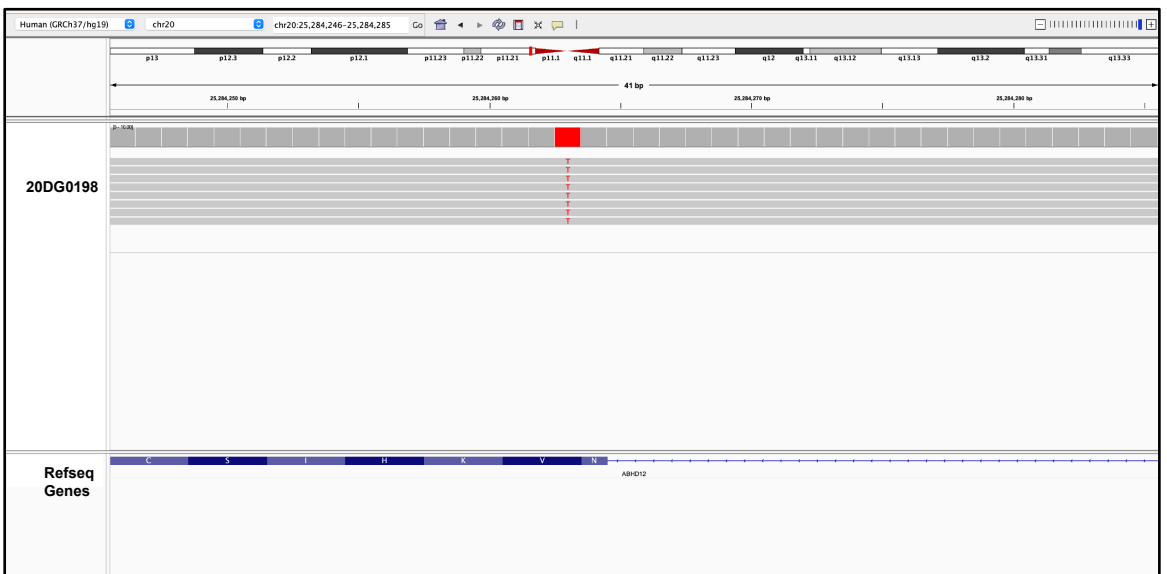

*ABHD12*  
NM\_001042472.3:c.952G>A;p.(Val318Met)

M

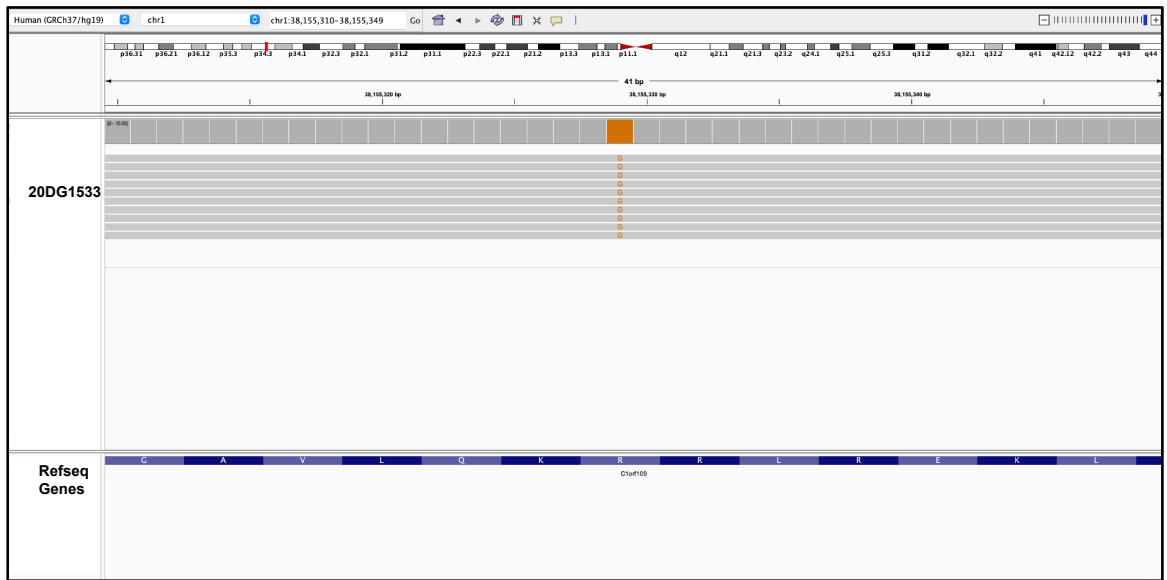

*C1orf109*  
NM\_001350767.2:c.224G>C;p.(Arg75Pro)

**Fig. S1: Functional validation of *TYMS*, *SNAP91*, and *SLC4A4* variants.**

A) Cell viability assay performed by treating fibroblast cells from patient (14DG1582) and two independent controls with 5-FU for 24hrs. Cell viability was measured using crystal violet and showed increase sensitivity of patient cells compared to control. Error bars denote standard deviation of 3 experiments. B and C) HEK293 cells were transfected with pCMV-RBGT1-SGFP-purified expression-ready linear constructs produced by PCR using (B) or (C) strategy as explained in Materials and Methods for 4 hours. Data are Mean +/- SEM of fluorescence intensity of the reporter activity. Data are Mean  $\pm$  SEM. **\*\*p < 0.01**. D and E) Transmission electron microscope images of fibroblast cells from patient (14DG2098) and control (D) as well as LCLs from patients (14DG2102, 14DG2107, and 17DG0429) and control (E). Control images showed widespread vesicles and of numerous sizes compared to patient cells which had irregularly shaped inclusions that were smaller in numbers compared to control.

**Fig. S2: Comparing variant detection using different depths on the Pacific Bioscience Sequel IIe platform.**

A-D) Comparing the detection power when using different depths by employing the number of SNVs and indels detected as a proxy.

**Fig. S3: PacBio data describing variants highlighted in this study.**

A-M) IGV screenshots of variants in families discussed in this study.



**Table S1: Sequences of primers used for the cloning-free reporter assay.**

|                          |                                                                |
|--------------------------|----------------------------------------------------------------|
| SLC4A4/-53-F             | 5'- CGC GGC CCC CCA GCC TCC AAC CCC GGT AGG CGT GTA CGG TG-3'  |
| SLCA4A/-53M-F            | 5'- CGC GGC CCC CCA GCC TCC AAC CCT GGT AGG CGT GTA CGG TG-3'  |
| SLC4A4/-53C-F            | 5'- CCA GCC TCC AAC CCC GGC GGC GCG CGG TAG GCG TGT ACG GTG-3' |
| SLC4A4/-53C/M-F          | 5'- CCA GCC TCC AAC CCT GGC GGC GCG CGG TAG GCG TGT ACG GTG-3' |
| Universal reverse primer | 5'- CCA TAG AGC CCA CCG CAT G-3'                               |

**Table S2: Coverage statistics for PacBio-sequenced samples.**

| No | Sample ID  | HiFi yield (Gb) | Coverage | Remarks      |
|----|------------|-----------------|----------|--------------|
| 1  | 13DG1861   | 25.95           | 31       | Trio Samples |
|    | 13DG1861   | 25.42           |          |              |
|    | 13DG1861   | 25.62           |          |              |
|    | 13DG1861   | 25.79           |          |              |
| 2  | 16DG0856   | 29.30           | 53       |              |
|    | 16DG0856   | 25.89           |          |              |
|    | 16DG0856   | 25.60           |          |              |
|    | 16DG0856   | 30.66           |          |              |
|    | 16DG0856   | 32.31           |          |              |
|    | 16DG0856   | 29.67           |          |              |
| 3  | 13DG1862   | 29.89           | 35       |              |
|    | 13DG1862   | 28.31           |          |              |
|    | 13DG1862   | 28.35           |          |              |
|    | 13DG1862   | 28.14           |          |              |
| 4  | 17DG1097   | 35.61           | 11       |              |
| 5  | 20DG0778   | 41.18           | 12       |              |
| 6  | 19DG1210   | 28.40           | 9        |              |
| 7  | 19DG1417   | 35.92           | 11       |              |
| 8  | 15DG0371   | 32.17           | 10       |              |
| 9  | 20DG1533   | 36.32           | 11       |              |
| 10 | 20DG0198   | 37.10           | 11       |              |
| 11 | 21DG0168   | 33.36           | 10       |              |
| 12 | 21DG0319   | 27.18           | 8        |              |
| 13 | 20DG0785   | 34.05           | 10       |              |
| 14 | 17DG0832   | 33.96           | 10       |              |
| 15 | 18DG0734   | 22.67           | 7        |              |
| 16 | 22DG0245   | 33.75           | 10       |              |
| 17 | 14DG1544   | 32.21           | 10       |              |
| 18 | 18DG0095   | 33.53           | 10       |              |
| 19 | 10DG0792   | 34.59           | 10       |              |
| 20 | 14DG2098   | 38.59           | 12       |              |
| 21 | 20DG0872   | 36.07           | 11       |              |
| 22 | 14DG1582   | 37.53           | 11       |              |
| 23 | 18DG0922   | 32.82           | 10       |              |
| 24 | 21DG0167   | 39.41           | 12       |              |
| 25 | 16DG0518   | 40.97           | 12       |              |
| 26 | 21DG0734   | 43.51           | 13       |              |
| 27 | 17DG0143   | 38.16           | 12       |              |
| 28 | 08DG-00413 | 34.31           | 10       |              |
| 29 | 20DG0235   | 36.79           | 11       |              |
| 30 | 15DG0056   | 30.57           | 9        |              |
| 31 | 14DG0876   | 21.10           | 6        |              |
| 32 | 14DG1854   | 27.70           | 8        |              |
| 33 | 15DG0960   | 21.13           | 6        |              |
| 34 | 18DG0147   | 23.15           | 7        |              |
| 35 | 20DG0820   | 43.80           | 13       |              |
| 36 | 20DG0192   | 35.33           | 11       |              |
| 37 | 20DG1379   | 34.01           | 10       |              |
| 38 | 14DG1422   | 25.41           | 19       |              |
|    | 14DG1422   | 38.15           |          |              |

**Table S3: List of variants identified within ROHs which were ultimately excluded.**

| Family ID | Case ID               | ROHs                                                                                                                                                                                                                                                                                                                                                                | Candidate Gene     | Candidate Variant                                                                                                                                                                                                                                                                                                                                                                                                                                                                                   | Zygosity                | Other candidates identified                                                    | Reason for proposing the causal variant                                                                                                                                                                                                              |
|-----------|-----------------------|---------------------------------------------------------------------------------------------------------------------------------------------------------------------------------------------------------------------------------------------------------------------------------------------------------------------------------------------------------------------|--------------------|-----------------------------------------------------------------------------------------------------------------------------------------------------------------------------------------------------------------------------------------------------------------------------------------------------------------------------------------------------------------------------------------------------------------------------------------------------------------------------------------------------|-------------------------|--------------------------------------------------------------------------------|------------------------------------------------------------------------------------------------------------------------------------------------------------------------------------------------------------------------------------------------------|
| F4386     | 14DG1582              | chr4:5505048-15467040, chr7:1181601-6535517, chr7:127850700-142458500, chr9:135745300-141077300, chr10:9773575-63186690, chr18:565414-6742958, and chr20:52932270-62906510                                                                                                                                                                                          | <i>TYMS</i>        | NM_001071.4:c.455-2073ins of 270bp                                                                                                                                                                                                                                                                                                                                                                                                                                                                  | Homozygous              | Homozygous variant in <i>MRPL41</i> (NM_032477.3:c.362C>T;p.(Pro121Leu))       | The missense variant in <i>MRPL41</i> failed segregation. Compelling biology, RT-qPCR results showed significant reduction in <i>TYMS</i> expression and cell viability assay data supporting the pathogenicity of the <i>TYMS</i> variant           |
| F6404     | 20DG0785              | chr2:224170800-233899400, chr2:237392500-243007900, chr3:104558700-133942900, chr4:7153211-15043740, chr7:37831300-45227590, chr7:79766350-106283800, chr9:98068780-103676700, chr9:107360800-109541500, chr11:14663580-22120650, chr11:115757900-120275200, and chr15:32018730-46564510                                                                            | <i>STK25</i>       | NM_001370694.2:c.2178+83del of 184bp (in <i>ANO7</i> )                                                                                                                                                                                                                                                                                                                                                                                                                                              | Homozygous              | No other candidates identified                                                 | Compelling biology and RT-qPCR data showed significant reduction in <i>STK25</i> expression                                                                                                                                                          |
| F3981     | 17DG1097              | No ROHs                                                                                                                                                                                                                                                                                                                                                             | <i>RP1L1</i>       | NM_178857.6:c.4026_4027insACAGAAGAGGCTGCAAGAGAGGGGGTGCAGTTAGAGGA AACTAAAACAGAAGAAGGGCTGCAAGAGAG GGGGTGCAGTTAGAGGAACTAAAACAGAAG AAGGGCTGCAAGAGAGGGGGTGCAGTTAG AGGGGACTAAA;p.Glu1343delinsThrGluGluGly LeuGlnGluGluGlyValGlnLeuGluGluThrLysThrGluGluGlyLeuGlnGluGluGlyValGlnLeuGluGluThrLys ThrGluGluGlyLeuGlnGluGluGlyValGlnLeuGluGly ThrLysGlu and NM_178857.6:c.3970_3971insGGACTAAAGTAA TAGAAGGGCTGCAAGAAGAGAGGGTGCAGT TAGAGG;p.Glu1324delinsGlyThrLysValIleGluGly LeuGlnGluGluArgValGlnLeuGluGlu | Compound heterozygous   | No other candidates identified                                                 | Known gene explaining the phenotype                                                                                                                                                                                                                  |
| F7974     | 20DG0235              | chr4:59009-24590070, chr4:38306260-90884090, chr4:110881900-131431600, chr4:137887100-145343600, and chr17:3686003-5644253                                                                                                                                                                                                                                          | <i>SLC4A4</i>      | NM_001134742.2:c.-145C>T                                                                                                                                                                                                                                                                                                                                                                                                                                                                            | Homozygous              | No other candidates identified                                                 | Known gene explaining the phenotype and functional validation by RT-qPCR and reporter assay                                                                                                                                                          |
| F4591     | 14DG2098              | Chr6: 80,016,660-86,734,460                                                                                                                                                                                                                                                                                                                                         | <i>SNAP91</i>      | NM_001242792.1:c.766-4799T>C                                                                                                                                                                                                                                                                                                                                                                                                                                                                        | Homozygous              | No other candidates identified                                                 | Compelling mouse model and functional validation by RT-qPCR and TEM imaging                                                                                                                                                                          |
| F5927     | 17DG0832              | chr6:21249760-30488200 and chr6:32645530-35107170                                                                                                                                                                                                                                                                                                                   | <i>LEMD2</i>       | NM_181336.4:c.1011-469_1011-450del                                                                                                                                                                                                                                                                                                                                                                                                                                                                  | Homozygous              | chr6:33746614-33746633 (homozygous intronic deletion of <i>IP6K3</i> )         | The intronic variant in <i>IP6K3</i> did not impact the gene's expression. Compelling biology and functional validation by RT-qPCR and nuclear morphology investigation supporting the pathogenicity of the <i>LEMD2</i> variant.                    |
| F3612     | 16DG0856              | chr1:210068000-232432600, chr11:695,795-1,082,938, chr6:7034459-9587035, chr6:114448600-116354600, and chr11:6562742-8737724                                                                                                                                                                                                                                        | <i>FLVCR1</i>      | NM_014053.4:c.1593+5_1593+8del                                                                                                                                                                                                                                                                                                                                                                                                                                                                      | Homozygous              | chr11:881509-881656 (148bp homozygous intronic deletion in <i>CHID1</i> )      | The intronic variant in <i>CHID1</i> did not impact the gene's expression. Compelling biology, mouse model, ongoing international cohort with compatible phenotypes and RT-PCR experiment supporting the pathogenicity of the <i>FLVCR1</i> variant. |
| F5543     | 16DG0518              | Multiple ROHs                                                                                                                                                                                                                                                                                                                                                       | <i>PKHD1</i>       | NM_138694.4:c.2180A>G;p.(Asn727Ser)                                                                                                                                                                                                                                                                                                                                                                                                                                                                 | Homozygous              | No other candidates identified                                                 | Known gene explaining the phenotype                                                                                                                                                                                                                  |
| F5349     | 20DG1379              | chr12:17650460-20029510, chr15:42570720-45225350, chr16:66569180-68225510, chr17:34819190-36049820, and chr21:22060530-22810770                                                                                                                                                                                                                                     | <i>BRIP1</i>       | NM_032043.3:c.2392C>T;p.(Arg798*)                                                                                                                                                                                                                                                                                                                                                                                                                                                                   | Homozygous              | No other candidates identified                                                 | Known gene explaining the phenotype                                                                                                                                                                                                                  |
| F5993     | 18DG0095              | chr6:36171210-37049770, chr6:39926300-44092130, chr6:46761880-49617860, chr8:22109110-23404770, chr9:79371210-81365970, and chr11:58331310-61616010                                                                                                                                                                                                                 | <i>STX3</i>        | NM_004177.5:c.786+190dup (ENST00000437946.2:c.455dup;p.(Asp152Glufs*11))                                                                                                                                                                                                                                                                                                                                                                                                                            | Homozygous              | No other candidates identified                                                 | Founder variant in a known gene explaining the phenotype                                                                                                                                                                                             |
| F8602     | 21DG0167 and 21DG0168 | Multiple ROHs                                                                                                                                                                                                                                                                                                                                                       | <i>NID1</i>        | NM_002508.3:c.3394C>T;p.(Arg1132Trp)                                                                                                                                                                                                                                                                                                                                                                                                                                                                | Heterozygous in parents | No other candidates identified                                                 | Compelling biology and a previously published family with presumed neonatal stroke (PMID: 25558065)                                                                                                                                                  |
| F7887     | 20DG0198              | chr2:116086900-155366000, chr3:63143710-76401520, chr4:134251200-174860000, chr5:33457620-67457160, chr5:165136400-180698100, chr6:56010890-63634670, chr7:117308400-121368900, chr7:132716500-135928100, chr10:108349900-123762400, chr11:23699670-97753120, chr15:55665090-79411260, chr16:78641740-84779100, chr17:6487141-12923990, and chr20:15661000-35316880 | <i>ABHD12</i>      | NM_001042472.3:c.952G>A;p.(Val318Met)                                                                                                                                                                                                                                                                                                                                                                                                                                                               | Homozygous              | chr4:170066984-170067056 (72bp homozygous deletion intronic of <i>SH3RF1</i> ) | The intronic variant in <i>SH3RF1</i> did not impact the gene's expression. Compelling biology and in silico prediction supporting the pathogenicity of the <i>ABHD12</i> variant                                                                    |
| F8544     | 20DG1533              | Multiple ROHs                                                                                                                                                                                                                                                                                                                                                       | <i>C1orf109</i>    | NM_001350767.2:c.224G>C;p.(Arg75Pro)                                                                                                                                                                                                                                                                                                                                                                                                                                                                | Homozygous              | No other candidates identified                                                 | Compelling mouse model and ongoing international cohort with compatible phenotypes                                                                                                                                                                   |
| F6440     | 19DG1417              | chr9:31537680-79306780                                                                                                                                                                                                                                                                                                                                              | <i>CHMP5</i>       | Duplication affecting CHMP5 (the coordinates for the gene chr9:33,264,877-33,282,067)                                                                                                                                                                                                                                                                                                                                                                                                               | Homozygous              | No other candidates identified                                                 | Compelling mouse model, cloning and RTPCR experiments confirming the truncating nature of the intragenic duplication                                                                                                                                 |
| F8280     | 20DG0820              | Multiple ROHs                                                                                                                                                                                                                                                                                                                                                       | <i>SHFM3</i> locus | (10:102,950,203_103,472,860)x3                                                                                                                                                                                                                                                                                                                                                                                                                                                                      | Heterozygous            | No other candidates identified                                                 | Known locus explaining the phenotype                                                                                                                                                                                                                 |

**Table S4: Detailed listing of the study cohort.**

| Pedigree name | PacBio outcome               | DG ID number          | Disease Name                                      | MIM #  | Relatedness between parents | Gene        | Variant                                                                                                    | Zygoty                | Phenotype                                                                                                                                                                                                                                                                                                                                                                                   | HGMD accession | ClinGen classification                                                                               |
|---------------|------------------------------|-----------------------|---------------------------------------------------|--------|-----------------------------|-------------|------------------------------------------------------------------------------------------------------------|-----------------------|---------------------------------------------------------------------------------------------------------------------------------------------------------------------------------------------------------------------------------------------------------------------------------------------------------------------------------------------------------------------------------------------|----------------|------------------------------------------------------------------------------------------------------|
| F4386         | Candidate variant identified | 14DG1582              | TYMS-related lactic acidosis                      | NA     | First cousins               | TYMS        | NM_001071.4:c.455-2073ins of 270bp                                                                         | Homozygous            | Increased serum lactate; Encephalopathy; Abnormal breathing; Metabolic acidosis; Widened subarachnoid space; Focal T2 hyperintense brainstem lesion                                                                                                                                                                                                                                         |                | Moderate_Variant evidence (2); Segregation evidence (3); I Experimental Evidence (2)                 |
| F6404         | Candidate variant identified | 20DG0785              | STK25-related neurodevelopmental disorder         | NA     | First cousins               | STK25       | NM_001370694.2:c.2178+83del of 184bp (in ANO7)                                                             | Homozygous            | Hearing impairment; Microcephaly; Short stature; Decreased body weight; Infra-orbital crease; Capillary hemangiomas (flat); Hypertonia; Failure to thrive                                                                                                                                                                                                                                   |                | Moderate_Variant evidence (1); Segregation evidence (1); Animal model (2); Experimental Evidence (2) |
| F3981         | Candidate variant identified | 17DG1097              | Retinitis pigmentosa 88                           | 618826 | Non-consanguineous          | RP1L1       | NM_178857.6:c.4026_4027ins[144];p.Glu1343delins[49] and NM_178857.6:c.3970_3971ins[48];p.Glu1324delins[17] | Compound heterozygous | Leber congenital amaurosis                                                                                                                                                                                                                                                                                                                                                                  |                | NA (known gene)                                                                                      |
| F7974         | Candidate variant identified | 20DG0235              | SLC4A4-related band keratopathy                   | NA     | First cousins               | SLC4A4      | NM_001134742.2:c.-145C>T                                                                                   | Homozygous            | Band keratopathy; Glaucoma; Corneal calcification; Choroidal detachment                                                                                                                                                                                                                                                                                                                     |                | NA (known gene)                                                                                      |
| F4591         | Candidate variant identified | 14DG2098              | SNAP91-related microcephalic primordial dwarfism  | NA     | First cousins               | SNAP91      | NM_001242792.1:c.766-4799T>C                                                                               | Homozygous            | Dwarfism; Microcephaly; Global developmental delay; Spastic tetraparesis; Gastroesophageal reflux; Failure to thrive; Abnormal facial shape; Deeply set eye; Prominent nose; Hypoplasia of dental enamel; High palate; Abnormal sternum morphology; Brain atrophy (mild); Interhemispheric cyst (small)                                                                                     |                | Moderate_Variant evidence (1); Segregation evidence (4); Animal model (2); Experimental Evidence (1) |
| F5927         | Candidate variant identified | 17DG0832              | LEMD2-related Neurodevelopmental disorder         | NA     | Same tribe                  | LEMD2       | NM_181336.4:c.1011-469_1011-450del                                                                         | Homozygous            | Microcephaly; Plagiocephaly; Abnormal number of hair whorls; Anteverted nares; Microtia; Deep palmar crease; Slow saccadic eye movements; Heart murmur; Distal arthrogyrosis; Adductor longus contractures; Increased muscle tone; Global developmental delay; Failure to thrive; Diffuse white matter abnormalities; Hip dysplasia; Dilatation of the renal pelvis; Mildly echogenic liver |                | Moderate_Variant evidence (1); Segregation evidence (4); Animal model (2); Experimental Evidence (1) |
| F3612         | Candidate variant identified | 16DG0856              | FLVCR1-related Diamond-Blackfan anemia            | NA     | First cousins               | FLVCR1      | NM_014053.4:c.1593+5_1593+8del                                                                             | Homozygous            | Microcephaly; Intrauterine growth retardation; Micrognathia; Malar hypoplasia; Low-set ears; Wide nasal bridge; Cleft palate; Short neck; Dysplastic radii; Agenesis of the right thumb; Hypoplastic left thumb; Clinodactyly; Joint contractures                                                                                                                                           | CD144017       | Moderate_Variant evidence (2); Segregation evidence (2); Animal model (4); Experimental Evidence (2) |
| F5543         | Candidate variant identified | 16DG0518              | Polycystic kidney disease 4                       | 263200 | Second cousins              | PKHD1       | NM_138694.4:c.2180A>G;p.(Asn727Ser)                                                                        | Homozygous            | Bilateral enlarged echogenic kidneys; Anhydramnios; Narrow chest; Flat nose; Rocker bottom feet; Distended abdomen; Intra-uterine fetal death                                                                                                                                                                                                                                               | CM054802       | NA (known gene)                                                                                      |
| F5349         | Candidate variant identified | 20DG1379              | Fanconi anemia, complementation group J           | 609054 | First cousins               | BRIP1       | NM_032043.3:c.2392C>T;p.(Arg798*)                                                                          | Homozygous            | Patent foramen ovale; PDA (large); Growth delay; Hypertelorism; Concave nasal ridge; Low-set ears; Posteriorly rotated ears; Ventriculomegaly; Intrauterine growth retardation; 2-3 toe syndactyly; Absent radius (bilateral); Hypoplasia of the ulna; Absent thumb (bilateral); Unilateral renal agenesis; Anal atresia                                                                    | CM053140       | NA (known gene)                                                                                      |
| F5993         | Candidate variant identified | 18DG0095              | STX3-related retinal dystrophy                    | NA     | First cousins               | STX3        | NM_004177.5:c.786+190dup (ENST00000437946.2:c.455dup; p.(Asp152Glufs*11))                                  | Homozygous            | Retinal dystrophy; Abnormality of retinal pigmentation                                                                                                                                                                                                                                                                                                                                      |                | NA (known gene)                                                                                      |
| F8602         | Candidate variant identified | 21DG0167 and 21DG0168 | NID1-related vein of Galen malformation           | NA     | Same tribe                  | NID1        | NM_002508.3:c.3394C>T;p.(Arg1132Trp)                                                                       | Heterozygous          | Parents of a deceased neonate with: Vein of Galen aneurysmal malformation; PDA; Cardiomegaly; Retrograde flow in the descending aorta; Dilated superior vena cava; Right ventricular dilatation; Respiratory failure; Bone marrow hypocellularity; Hypotension; Hyponatremia; Metabolic acidosis;                                                                                           |                | Moderate_Variant evidence (2); Segregation evidence (3); Animal model (2)                            |
| F7887         | Candidate variant identified | 20DG0198              | ABHD12-related developmental regression           | NA     | First cousins               | ABHD12      | NM_001042472.3:c.952G>A;p.(Val318Met)                                                                      | Homozygous            | Global developmental delay; Developmental regression; Ear pain; Generalized hypotonia; Hyporeflexia                                                                                                                                                                                                                                                                                         |                | NA (known gene)                                                                                      |
| F8544         | Candidate variant identified | 20DG1533              | C1orf109-related neurodevelopmental disease       | NA     | Same tribe                  | C1orf109    | NM_001350767.2:c.224G>C;p.(Arg75Pro)                                                                       | Homozygous            | Global brain atrophy; Global developmental delay; Spastic tetraplegia; Seizure; Blindness; Hearing impairment; Microcephaly; Upper and lower limb spasticity; Nystagmus; Flexion contracture                                                                                                                                                                                                |                | Moderate_Variant evidence (2); Segregation evidence (4.5); Experimental Evidence (2)                 |
| F6440         | Candidate variant identified | 19DG1417              | CHMP5-related Neurodevelopmental disorder         | NA     | First cousins               | CHMP5       | Duplication affecting CHMP5 (the coordinates for the gene chr9:33,264,877-33,282,067)                      | Homozygous            | Global developmental delay; Seizures; Microcephaly; Short stature; Decreased body weight; Muscular hypotonia of the trunk; Spasticity; Clonus; Scoliosis; Hirsutism                                                                                                                                                                                                                         |                | Moderate_Variant evidence (2); Segregation evidence (3); Experimental Evidence (2)                   |
| F8280         | Candidate variant identified | 20DG0820              | SHFM3                                             | 246560 | Double first cousins        | SHFM3 locus | (10:102,950,203_103,472,860)x3                                                                             | Heterozygous          | Abnormality of limbs; Oligodactyly                                                                                                                                                                                                                                                                                                                                                          |                | NA (known locus)                                                                                     |
| F141          | Unsolved                     | 08DG-00413            | OTX2-related infertility and retinitis pigmentosa | NA     | First cousins               | OTX2        | NM_001270525.2:r.98_273del;p.(Pro34Metfs*3)                                                                | Homozygous            | Rod-cone dystrophy; Infertility                                                                                                                                                                                                                                                                                                                                                             |                | Moderate_Variant evidence (2); Segregation evidence (5); Experimental Evidence (2)                   |

| Pedigree name | PacBio outcome | DG ID number | Disease Name                                         | MIM # | Related-ness between parents | Gene | Variant | Zygoty | Phenotype                                                                                                                                                                                                                                                                                                                                                                                                                                      | HGMD accession | ClinGen classification |
|---------------|----------------|--------------|------------------------------------------------------|-------|------------------------------|------|---------|--------|------------------------------------------------------------------------------------------------------------------------------------------------------------------------------------------------------------------------------------------------------------------------------------------------------------------------------------------------------------------------------------------------------------------------------------------------|----------------|------------------------|
| F1070         | Unsolved       | 10DG0792     | <i>Congenital lipodystrophy</i>                      |       | First cousins                |      |         |        | Congenital generalized lipodystrophy                                                                                                                                                                                                                                                                                                                                                                                                           |                |                        |
| F4206         | Unsolved       | 14DG0876     | <i>Sensory and motor neuropathy</i>                  |       | Non-consanguineous           |      |         |        | Sensorimotor neuropathy                                                                                                                                                                                                                                                                                                                                                                                                                        |                |                        |
| F4351         | Unsolved       | 14DG1422     | <i>Primordial dwarfism</i>                           |       | Consanguineous               |      |         |        | Short stature; Intellectual disability; Severe failure to thrive                                                                                                                                                                                                                                                                                                                                                                               |                |                        |
| F4379         | Unsolved       | 14DG1544     | <i>Progressive osteolysis</i>                        |       | Second cousins               |      |         |        | Progressive osteolysis                                                                                                                                                                                                                                                                                                                                                                                                                         |                |                        |
| F4424         | Unsolved       | 14DG1854     | <i>Neurodevelopmental disorder</i>                   |       | First cousins                |      |         |        | Intellectual disability; Long face; Mandibular prognathia; Broad-based gait; Dysdiadochokinesis                                                                                                                                                                                                                                                                                                                                                |                |                        |
| F4697         | Unsolved       | 15DG0056     | <i>Short-rib thoracic dysplasia with polydactyly</i> |       | First cousins                |      |         |        | Narrow chest; Dysmorphic facies; Prominent occiput; Short extremities; Polydactyly; Nail hypoplasia                                                                                                                                                                                                                                                                                                                                            |                |                        |
| F4808         | Unsolved       | 15DG0371     | <i>Neurodevelopmental disorder</i>                   |       | First cousins                |      |         |        | Abnormal facial shape; Triangular face; Depressed nasal bridge; Small and pointed chin; High arched palate; Small low set ears; Conical shaped incisors; Single palmar crease; Clinodactyly; Spina bifida occulta at L1; Bilateral sensorineural hearing loss; Global developmental delay                                                                                                                                                      |                |                        |
| F5016         | Unsolved       | 15DG0960     | <i>Adams-Oliver syndrome-like</i>                    |       | First cousins                |      |         |        | Renovascular hypertension; Distal limb reduction anomalies; Brachydactyly; Specific learning disability; Clinodactyly of the 5th finger; Tapered finger; 2-3 toe syndactyly; Tapered toe; Short distal phalanx of finger; Sandal gap; Plantar crease between first and second toes; Short 5th toe; Short hallux; Small nail; 2-4 toe cutaneous syndactyly; Absent distal phalanges                                                             |                |                        |
| F5638         | Unsolved       | 17DG0143     | <i>Arthrogryposis multiplex</i>                      |       | First cousins                |      |         |        | Arthrogryposis multiplex congenita                                                                                                                                                                                                                                                                                                                                                                                                             |                |                        |
| F6001         | Unsolved       | 18DG0147     | <i>Intellectual disability and epilepsy</i>          |       | First cousins                |      |         |        | Intellectual disability; Seizures; Global developmental delay; Alopecia of scalp; Delayed speech and language development; Hyperactivity                                                                                                                                                                                                                                                                                                       |                |                        |
| F6204         | Unsolved       | 18DG0734     | <i>Neurodevelopmental disorder</i>                   |       | Non-consanguineous           |      |         |        | Seizures; Hemiparesis; Dilatation of lateral ventricles; Hyperreflexia; Lower limb muscle weakness; Upper limb muscle weakness                                                                                                                                                                                                                                                                                                                 |                |                        |
| F6470         | Unsolved       | 18DG0922     | <i>Crohn's Disease</i>                               |       | First cousins                |      |         |        | Crohn's disease                                                                                                                                                                                                                                                                                                                                                                                                                                |                |                        |
| F6859         | Unsolved       | 19DG1210     | <i>Primary ciliary dyskinesia</i>                    |       | First cousins                |      |         |        | Dextrocardia; Abnormal heart morphology; Atrial septal defect; Gastroesophageal reflux; Asthma; Failure to thrive; Chronic constipation; Vomiting; Recurrent gastroenteritis; Polysplenia; Global developmental delay; Ciliary dyskinesia; Cough; Hypotonia; Recurrent lower respiratory tract infections                                                                                                                                      |                |                        |
| F7886         | Unsolved       | 20DG0192     | <i>Neurodevelopmental disorder</i>                   |       | Second cousins               |      |         |        | Attention deficit hyperactivity disorder; Autism; Intellectual disability; Delayed speech and language development; Obesity; Micropenis; Abnormal facial shape; Downslanted palpebral fissures; Thick lower lip vermillion; Widely spaced teeth                                                                                                                                                                                                |                |                        |
| F8283         | Unsolved       | 20DG0778     | <i>Striae distense</i>                               |       | Double first cousin          |      |         |        | Striae distensae; Cutis laxa; Myopia; Localized skin lesion; Asymmetry of the breasts; Hypermelanotic macule; Premature skin wrinkling                                                                                                                                                                                                                                                                                                         |                |                        |
| F8329         | Unsolved       | 20DG0872     | <i>Polycystic kidney disease</i>                     |       | First cousins                |      |         |        | Polycystic kidney dysplasia; Hepatic fibrosis                                                                                                                                                                                                                                                                                                                                                                                                  |                |                        |
| F8644         | Unsolved       | 21DG0319     | <i>Joubert syndrome</i>                              |       | Non-consanguineous           |      |         |        | Global developmental delay; Hypotonia; Abnormal facial shape; Hypertelorism; Flat occiput; Cutaneous lesion Brisk reflexes; Molar tooth sign on MRI                                                                                                                                                                                                                                                                                            |                |                        |
| F4275         | Unsolved       | 21DG0734     | <i>Jeune Syndrome</i>                                |       | First cousins                |      |         |        | Skeletal dysplasia; Mesomelic short stature; Lower thoracic interpediculate narrowness; Narrow greater sciatic notch; Polydactyly; Abnormality of the metacarpal bones; Abnormal metatarsal morphology; Abnormal finger phalanx morphology; Secundum atrial septal defect; Patent foramen ovale; Respiratory distress; Bell-shaped thorax; Echogenic fetal bowel; Fetal pyelectasis; Short long bone; Hand clenching; Abnormal foot morphology |                |                        |

**Table S5: List of transcription factors predicted to bind to the deleted region in F6404 with JASPER confidence scores.**

| TF list            | p-value             |
|--------------------|---------------------|
| <i>PATZ1</i>       | $10^{-7}$           |
| <i>PLAG1</i>       |                     |
| <i>KLF15</i>       | $10^{-5} - 10^{-6}$ |
| <i>SP2</i>         |                     |
| <i>KLF14</i>       |                     |
| <i>ZNF320</i>      |                     |
| <i>PRDM9</i>       |                     |
| <i>ZNF610</i>      |                     |
| <i>EGR1</i>        |                     |
| <i>SP3</i>         |                     |
| <i>KLF16</i>       |                     |
| <i>ZNF148</i>      |                     |
| <i>SP1</i>         |                     |
| <i>KLF1</i>        |                     |
| <i>SP4</i>         |                     |
| <i>KLF12</i>       |                     |
| <i>KLF10</i>       |                     |
| <i>KLF7</i>        |                     |
| <i>KLF5</i>        |                     |
| <i>ZNF740</i>      |                     |
| <i>RARA::RXRG</i>  | $10^{-4}$           |
| <i>ZNF530</i>      |                     |
| <i>TFAP2A</i>      |                     |
| <i>CTCF</i>        |                     |
| <i>ZNF93</i>       |                     |
| <i>TFAP4::ETV1</i> |                     |
| <i>NR1H2</i>       |                     |
| <i>ZIC5</i>        |                     |
| <i>Zic1::Zic2</i>  |                     |
| <i>EGR2</i>        |                     |
| <i>ZBTB14</i>      |                     |
| <i>Nrf1</i>        |                     |
| <i>EGR3</i>        |                     |
| <i>SP9</i>         |                     |
| <i>ZNF343</i>      |                     |
| <i>VEZF1</i>       |                     |
| <i>KLF11</i>       |                     |
| <i>KLF4</i>        |                     |
| <i>KLF2</i>        |                     |
| <i>KLF3</i>        |                     |
| <i>KLF6</i>        |                     |
| <i>MAZ</i>         |                     |
| <i>INSM1</i>       |                     |
| <i>ZNF454</i>      |                     |
| <i>SP8</i>         |                     |
| <i>ZNF281</i>      |                     |
| <i>E2F6</i>        |                     |
| <i>ZIC1</i>        |                     |
| <i>GLIS2</i>       |                     |
| <i>EGR4</i>        |                     |
| <i>Wt1</i>         |                     |
| <i>ZNF701</i>      |                     |
| <i>NR2C2</i>       |                     |
